# Supplementary material for: Selection and preliminary evaluation of superior individual plant in Camellia oleifera
Source: PeerJ. 2025 Nov 20;13:e20283. doi: 10.7717/peerj.20283 (PMC12640634; doi:10.7717/peerj.20283)
Supplement: Supplemental Information 1 [file peerj-13-20283-s001.xlsx]

## Sheet: Sheet1
	H1	H2	H3	H4	H5	H6	H7	H8	H9	H10	H11	H12	H13	H14	H15	H16	H17	H18	H19	H20	H21	H22	H23	H24	H25
Plant height	2.15	2.5	2.03	3	2.83	2.45	2.75	2.75	2.35	1.94	2.52	2.85	2.25	2.15	2.15	2.55	2.25	1.8	2.75	2.6	1.95	3.1	2.65	2.21	2.42
Crown width (east-west)	2.5	2.85	1.55	2.57	2.55	3.05	1.9	2.9	3.15	1.48	1.9	2.15	2	2.45	2	1.6	1.95	2.4	2.18	1.35	1.75	2.7	2.75	1.76	1.53
Crown width (north-south)	2.5	2.88	1.83	2.65	2.25	3	2.18	2.9	2.9	1.2	1.85	3.3	1.9	2.35	1.6	1.5	2.2	1.88	2.2	1.7	2	3.1	2.4	2.24	1.6
Canopy area	4.90874	6.44655	2.22778	5.34895	4.50622	7.18639	3.25312	6.6052	7.17461	1.39487	2.76067	5.5724	2.98451	4.52193	2.51327	1.88496	3.36936	3.54372	3.76677	1.80249	2.74889	6.57378	5.18363	3.09635	1.92265
Yield per plant	2.25822	5.67221	0.5691	1.5983	2.97048	3.18107	0.34193	1.69327	1.74783	0.94521	0.87165	1.15205	0.88367	2.36838	0.32716	3.31358	1.18942	3.29758	1.48529	0.57659	0.58001	0.94415	0.87067	0.82634	0.8628
Yield per square metre of canopy	0.46004	0.87988	0.25546	0.29881	0.6592	0.44265	0.10511	0.25635	0.24361	0.67763	0.31574	0.20674	0.29609	0.52375	0.13017	1.75791	0.35301	0.93054	0.39431	0.31989	0.211	0.14362	0.16797	0.26688	0.44875
land equivalent yield	361.32	691.06	200.63	234.68	517.73	347.66	82.55	201.34	191.33	532.21	247.98	162.37	232.54	411.36	102.24	1380.66	277.25	730.85	309.69	251.24	165.72	112.8	131.92	209.6	352.45
Fruit weight	33.8812	50.0024	26.9581	33.7012	38.1956	36.8204	48.8	37.0392	41.2948	33.1838	26.2404	33.2184	35.2808	33.9329	21.8085	40.6289	25.2459	32.7924	27.2896	19.0628	22.2819	23.5643	17.2237	26.0629	26.4208
Pericarp weight	20.9532	26.3716	14.7119	17.8644	22.0616	20.6904	32.5586	19.8964	22.9596	17.8162	14.7793	20.654	18.7132	17.9505	11.3466	21.9412	13.7733	18.8052	15.0812	8.17053	13.4623	11.8193	11.365	13.9383	14.9911
Pericarp thickness	4.8152	4.4072	3.44524	3.9524	5.1172	4.1876	6.56714	4.5444	4.4028	3.70462	4.5137	4.8276	4.2308	4.13368	3.56333	4.146	3.8356	4.2036	4.3688	2.77737	3.97462	2.86321	4.50567	3.80917	3.53077
Fruit longitudinal diameter	41.896	41.022	35.8662	39.5264	39.0508	38.9088	43.7514	40.5716	41.8152	38.1662	36.627	39.7484	44.562	38.5968	34.1793	39.4948	36.8924	39.9396	38.632	37.6758	33.4661	37.4246	34.3943	38.4146	36.5754
Fruit transverse diameter	41.1968	47.6492	36.3033	40.1896	42.3052	41.872	45.0014	40.8832	42.8564	40.2039	35.9626	40.0324	38.19	40.3963	34.4627	42.8888	35.1088	39.6584	37.4136	31.979	33.8488	36.3796	31.402	37.5812	36.9846
Fruit shape index	1.01789	0.8638	0.99617	0.98633	0.92393	0.93157	0.9751	0.99801	0.98004	0.95203	1.0261	0.99578	1.18884	0.95882	0.99651	0.92351	1.0633	1.00819	1.03382	1.18474	0.9982	1.033	1.10433	1.02368	0.99061
Seed number per plant	3	5	5	6	6	5	5	5	6	4	3	4	3	6	4	7	4	5	4	5	4	3	2	4	4
100-seed weight	404.594	500.803	278.592	276.744	266.653	317.9	311.9	351.605	324.818	359.813	408.714	337.427	509.733	283.97	271.684	340.45	382.527	281.977	302.927	231.148	220.44	465.099	298.035	336.304	294.882
Seed moisture content	0.59	0.438	0.36238	0.3864	0.3824	0.4148	0.34143	0.5116	0.5044	0.43192	0.40889	0.8728	0.5304	0.3914	0.36739	0.37213	0.38729	0.55382	0.33682	0.28514	0.38517	0.37775	0.45969	0.35608	0.38961
Fresh seed rate	0.3796	0.4712	0.43857	0.4688	0.4208	0.44	0.31857	0.4536	0.4332	0.46423	0.43333	0.3704	0.4716	0.46981	0.47454	0.45855	0.44544	0.42142	0.44671	0.56654	0.36956	0.49698	0.33202	0.46399	0.43171
Dry seed rate	0.41001	0.56246	0.63742	0.61339	0.6175	0.58554	0.65921	0.48865	0.49465	0.56832	0.59035	0.5373	0.46893	0.6086	0.63261	0.62787	0.61271	0.44618	0.66318	0.71486	0.61483	0.62225	0.54031	0.64392	0.61039
Seed Oil content	0.23172	0.32475	0.37426	0.34766	0.34538	0.37471	0.38148	0.28291	0.29457	0.34999	0.40581	0.32646	0.27394	0.31213	0.40276	0.39539	0.37209	0.28735	0.44127	0.36273	0.38806	0.40331	0.34279	0.45844	0.43386
